# Supplementary material for: Methodology of a combined approach: analytical techniques to identify the technology and raw materials used in thin-walled pottery from Herculaneum and Pompeii
Source: Royal Society of Chemistry journal article supplement (doi:10.1039/c3ay42195c), 2014-01-01
Supplement: c3ay42195c1.pdf [file c3ay42195c1.pdf]

## Supplementary data

Table A Samples analyzed.

| Archaeol. site | Sample | Identification number                                                                                | Description                                                                                 |
|----------------|--------|------------------------------------------------------------------------------------------------------|---------------------------------------------------------------------------------------------|
| Herculaneum    | H1     | 77168/1888                                                                                           | Small, egg-shaped jug, with one handle. Ricci's typology 1/117.                             |
|                | H2     | 76994/1716                                                                                           | Small, egg-shaped jug, with one handle.                                                     |
|                | H3     | 77260/1979                                                                                           | Small jug with two handles, decorated by wheel.                                             |
|                | H4     | 77756/2459                                                                                           | Small, egg-shaped jug, decorated by barbotine technique, imitating slivers of pine cones.   |
|                | H5     | 78189/2892                                                                                           | Small, egg-shaped jug, with one handle, decorated by wheel. Ricci's typology 1/117.         |
|                | H6     | 78196/2899                                                                                           | Cup with foot, decorated by wheel.                                                          |
|                | H7     | 78261/2964                                                                                           | Small, egg-shaped jug, with one handle, decorated by wheel. Ricci's typology 1/117.         |
|                | H8     | 77005/1727                                                                                           | Small, egg-shaped jug, with one handle. Ricci's typology 1/117.                             |
|                | H9     | 77006(1728)                                                                                          | Small, egg-shaped jug, with one handle.                                                     |
|                | H10    | 77075/1795                                                                                           | Small cup, with two handles. Ricci's typology 2/223.                                        |
|                | H11    | 75920/643                                                                                            | Small cup, with two handles. Ricci's typology 2/223.                                        |
|                | H12    | 75564/288                                                                                            | -                                                                                           |
| Pompeii        | P1     | 10411B                                                                                               | Small, egg-shaped jug, with one handle. Ricci's typology 1/31.                              |
|                | P2     | 43666                                                                                                | Small, egg-shaped jug, with one handle. Ricci's typology 1/24.                              |
|                | P3     | 43896                                                                                                | Small, egg-shaped jug, with one handle, decorated with depressions. Ricci's typology 1/31.  |
|                | P4     | 43870                                                                                                | Small, egg-shaped jug.                                                                      |
|                | P5     | 6297                                                                                                 | Small, egg-shaped jug, with one handle, decorated with depressions. Ricci's typology 1/31.  |
|                | P6     | 19482                                                                                                | Small, egg-shaped jug, with one handle. Ricci's typology 1/117.                             |
|                | P7     | 14257                                                                                                | Small, globular-shaped glass, decorated with slivers of pine cones. Ricci's typology 1/371. |
| P8             | 19485  | Small, egg-shaped jug, with one handle. Ricci's typology 1/117.                                      |                                                                                             |
| P9             | 4105A  | Small, egg-shaped jug, with one handle, decorated with slivers of pine cones. Ricci's typology 1/23. |                                                                                             |
| P10            | 17056  | Cup, with two handles, decorated with large and isolated waterleaves. Ricci's typology 2/134.        |                                                                                             |
| P11            | 12013  | Small, egg-shaped jug, with one handle. Ricci's typology 1/111.                                      |                                                                                             |
| P12            | 10610  | Small, egg-shaped jug, with one handle, decorated with depressions. Ricci's typology 1/31.           |                                                                                             |
| P13            | 17057  | Small, egg-shaped jug, with one handle, decorated with slivers of pine cones. Ricci's typology 1/23. |                                                                                             |
| P14            | 15001  | Small, egg-shaped jug, with one handle. Ricci's typology 1/111.                                      |                                                                                             |
| P15            | 4105B  | Small, egg-shaped jug, with one handle, decorated with slivers of pine cones. Ricci's typology 1/23. |                                                                                             |
| P16            | 43727  | Small, egg-shaped jug, with one handle, decorated with slivers of pine cones. Ricci's typology 1/23. |                                                                                             |
| P17            | 43771  | -                                                                                                    |                                                                                             |
| P18            | 9961   | Small cup, with two handles.                                                                         |                                                                                             |
| P19            | 9966   | Small cup, with two handles.                                                                         |                                                                                             |
| P20            | 15377  | Small, egg-shaped jug, with one handle. Ricci's typology 1/23.                                       |                                                                                             |
| P21            | 15671  | Carinated cup. Ricci's typology 2/248.                                                               |                                                                                             |
| P22            | 13046  | Small, neckband jug, with one handle. Ricci's typology 1/122.                                        |                                                                                             |
| P23            | 43679  | Small cup, with one handle.                                                                          |                                                                                             |
| P24            | 43725  | Small, egg-shaped jug, with one handle. Ricci's typology 1/23.                                       |                                                                                             |
| P25            | 1363   | Small cup, with one handle.                                                                          |                                                                                             |
| P26            | 19621  | -                                                                                                    |                                                                                             |
| P27            | 12290A | -                                                                                                    |                                                                                             |
| P28            | 9964   | Carinated cup, with two handles. Ricci's typology 2/290.                                             |                                                                                             |

|     |       |                                                                                                                                             |
|-----|-------|---------------------------------------------------------------------------------------------------------------------------------------------|
| P29 | -     | -                                                                                                                                           |
| P30 | 43895 | Small, egg-shaped jug, with one handle. Ricci's typology 1/111.                                                                             |
| P31 | 43742 | Small cup.                                                                                                                                  |
| P32 | 15553 | Egg-shaped glass. Ricci's typology 1/13.                                                                                                    |
| P33 | 17058 | Small jug, with one handle. Ricci's typology 1/23.                                                                                          |
| P34 | 16595 | -                                                                                                                                           |
| P35 | 14934 | Small, egg-shaped jug, with one handle, decorated by barbotine technique representing a caricature of a human face. Ricci's typology 1/111. |
| P36 | 17700 | Little jug, decorated with depressions.                                                                                                     |

|                   |                                |      |      |       |
|-------------------|--------------------------------|------|------|-------|
|                   | MgO                            | 12,1 | 0,12 | 11,88 |
|                   | CaO                            | 21,8 | 0,17 | 21,62 |
|                   | Na <sub>2</sub> O              | 0,9  | 0,04 | 0,79  |
|                   | K <sub>2</sub> O               | n.d. | —    | 0,01  |
|                   | Tot                            | 99,4 |      | 99,11 |
| <b>Orthoclase</b> | SiO <sub>2</sub>               | 64,1 | 0,11 | 64,30 |
|                   | Al <sub>2</sub> O <sub>3</sub> | 20,0 | 0,12 | 9,90  |
|                   | CaO                            | 0,2  | 0,04 | 0,24  |
|                   | Na <sub>2</sub> O              | 3,9  | 0,04 | 3,70  |
|                   | K <sub>2</sub> O               | 11,4 | 0,11 | 11,40 |
|                   | Tot                            | 99,5 |      | 99,54 |

n. d. = not detected

Table C Operating conditions and data acquisition parameters used for LA-ICP-MS analysis.

Table B a) Standards used for element calibrations; b) Mean of 5 microanalyses on two reference standards (Augite and Orthoclase) with the relative standard deviation ( $\sigma$ ) and the certified value from Micro-Analysis Consultants Ltd. (U.K.).

a)

| Element | Standard     | Type               |
|---------|--------------|--------------------|
| Si      | Wollastonite | natural compound   |
| Ti      | Titanite     | natural compound   |
| Al      | Corundum     | synthetic compound |
| Fe      | Almandine    | natural compound   |
| Mn      | Mn           | natural compound   |
| Mg      | Periclase    | synthetic compound |
| Ca      | Wollastonite | natural compound   |
| Na      | Albite       | natural compound   |
| K       | Orthoclase   | natural compound   |

b)

|               | Mean                           | $\sigma$ | Certified value |       |
|---------------|--------------------------------|----------|-----------------|-------|
| <b>Augite</b> | SiO <sub>2</sub>               | 46,3     | 0,28            | 45,93 |
|               | TiO <sub>2</sub>               | 2,4      | 0,10            | 2,29  |
|               | Al <sub>2</sub> O <sub>3</sub> | 8,8      | 0,09            | 9,02  |
|               | Cr <sub>2</sub> O <sub>3</sub> | n.d.     | —               | 0,08  |
|               | FeO                            | 7,2      | 0,16            | 7,42  |
|               | MnO                            | 0,1      | 0,06            | 0,07  |

|                          |                                                  |                                                                                                                                                                                   |
|--------------------------|--------------------------------------------------|-----------------------------------------------------------------------------------------------------------------------------------------------------------------------------------|
| <b>ICP-MS</b>            | RF power                                         | 1400 W                                                                                                                                                                            |
|                          | Coolant (plasma)                                 | Ar: 13 l min <sup>-1</sup>                                                                                                                                                        |
|                          | Auxiliary                                        | Ar: 0.7 l min <sup>-1</sup>                                                                                                                                                       |
|                          | Sample transport                                 | He: $\approx$ 0.5 l min <sup>-1</sup><br>(in the ablation cell),<br>Ar (make up gas flow):<br>$\approx$ 0.7 l min <sup>-1</sup>                                                   |
|                          | Gas flows                                        |                                                                                                                                                                                   |
| <b>Laser</b>             | Wavelength                                       | 213 nm (Nd:YAG)                                                                                                                                                                   |
|                          | Pulse width (FWHM)                               | 3 ns                                                                                                                                                                              |
|                          | Energy distribution                              | Homogenized, flat beam, aperture imaged                                                                                                                                           |
|                          | Energy density (fluence) on sample surface       | 2.5-4.0 J cm <sup>-2</sup>                                                                                                                                                        |
|                          | Focus                                            | Fixed at surface                                                                                                                                                                  |
|                          | Repetition rate                                  | 5 Hz                                                                                                                                                                              |
|                          | Crater diameter                                  | $\approx$ 32 $\mu$ m                                                                                                                                                              |
| Line scan speed          | 20 $\mu$ m/s                                     |                                                                                                                                                                                   |
| Scanning mode            | Peak jumping, 1 point per peak, 10 ms dwell time |                                                                                                                                                                                   |
| Acquisition mode         | Time resolved analysis                           |                                                                                                                                                                                   |
| <b>Analysis protocol</b> | Analysis duration                                | 120 s ( $\approx$ 60 s background, 30 s signal, 30 s washout)                                                                                                                     |
|                          | Elements' isotopes used for PCA                  | <sup>24</sup> Mg, <sup>27</sup> Al, <sup>29</sup> Si, <sup>39</sup> K, <sup>44</sup> Ca, <sup>47</sup> Ti, <sup>52</sup> Cr, <sup>57</sup> Fe, <sup>85</sup> Rb, <sup>88</sup> Sr |

Table D Detection limits in LA-ICPMS for the elements used to classify archaeological samples calculated using the  $3\sigma$  criterion and for an actual laser beam equal to 55  $\mu\text{m}$ .

|    |                  |
|----|------------------|
| Si | 38 mg            |
| Al | 1 mg             |
| Ca | 4 mg             |
| Fe | 1 mg             |
| Mg | 17 $\mu\text{g}$ |
| K  | 97 $\mu\text{g}$ |
| Ti | 38 $\mu\text{g}$ |
| Cr | 29 $\mu\text{g}$ |
| Rb | 6 $\mu\text{g}$  |
| Sr | 1 $\mu\text{g}$  |
